# Supplementary material for: The ESPA (Enhanced Structural Path Analysis) method: a solution to an implementation challenge for dynamic life cycle assessment studies
Source: Springer Nature journal article supplement (doi:10.1007/s11367-014-0710-9), 2014-02-03
Supplement: MOESM1 [file 5819354]

electronic supplementary material

In this paper, convolution is used to propagate the process-relative temporal information onto a specific life cycle (see section 3.2). A convolution is a mathematical operation between two functions or, in this case, two discrete distributions *f* and *g*, resulting in one function denoted *f*g* and defined as:

At a given time t, it corresponds to the integral of the product of the two distributions after one is reversed (g(τ) becomes g(-τ)) and translated over time (g(-τ) becomes g(t- τ)).

Fig. S1: a simplified example of the product of convolution between two discrete distributions.

|  |
| --- |
| Fig. S1: A simplified example of the product of convolution between two discrete distributions |

The figures below present a simplified example of the convolution between two discrete distributions used with the ESPA method, and based on the example given in section 3.3 of the paper. At some point, equation 6 requires to compute the convolution e2*t21 between the distribution of the elementary flow of emitted CO2 for process B (e2, Fig. S2 and Table 2 in the paper) and the distribution of the flows of process B required for process A (t21, Fig. S3 and Table 1 in the paper). The result of the convolution is shown in Fig. S4, it illustrates that the CO2 emitted during the process B is propagated in time, when process B is used in process A.

Fig. S2: distribution of the elementary flow of emitted CO2 for process B (e2)

Fig. S3: distribution of process B flows required for process A (t21)

Fig. S4: result of the product of convolution between e2 and t21 with a monthly accuracy
